# Supplementary material for: Utility of Animal Models to Understand Human Alzheimer’s Disease, Using the Mastermind Research Approach to Avoid Unnecessary Further Sacrifices of Animals
Source: MDPI journal article supplement (doi:10.3390/ijms21093158), 2020-04-30
Supplement: s1 [file s1]

### Supplementary Material 3

**Table S2.** Overview of literature researching for the selection of AD biomarkers in section 3.

| Literature search tool: PubMed                                    |                              |
|-------------------------------------------------------------------|------------------------------|
| Search Filters                                                    | Numbers of literatures found |
| Cholinergic [Title/Abstract] AND Alzheimer [Title/Abstract]       | 1049                         |
| Tau [Title/Abstract] AND Alzheimer [Title/Abstract]               | 3173                         |
| Amyloid [Title/Abstract] AND Alzheimer [Title/Abstract]           | 7776                         |
| Reactive Gliosis [Title/Abstract] AND Alzheimer [Title/Abstract]  | 199                          |
| Oxidative stress [Title/Abstract] AND Alzheimer [Title/Abstract]  | 1116                         |
| Cerebrovascular [Title/Abstract] AND Alzheimer [Title/Abstract]   | 767                          |
| Neurodegeneration [Title/Abstract] AND Alzheimer [Title/Abstract] | 1649                         |
|                                                                   |                              |
| ((Abeta1-42) AND CSF) AND Alzheimer                               | 357                          |
| ((Abeta1-42) AND plasma) AND Alzheimer                            | 142                          |
| ((Abeta1-40) AND CSF) AND Alzheimer                               | 88                           |
| ((Abeta1-40) AND plasma) AND Alzheimer                            | 93                           |
| ((P-tau) AND CSF) AND Alzheimer                                   | 566                          |
| ((P-tau) AND plasma) AND Alzheimer                                | 51                           |
| ((T-tau) AND CSF) AND Alzheimer                                   | 520                          |
| ((T-tau) AND plasma) AND Alzheimer                                | 45                           |
| ((neurofilament light) AND CSF) AND Alzheimer                     | 114                          |
| ((neurofilament light) AND plasma) AND Alzheimer                  | 36                           |
| ((neurogranin) AND CSF) AND Alzheimer                             | 57                           |
| ((neurogranin) AND plasma) AND Alzheimer                          | 10                           |
| ((SNAP-25) AND CSF) AND Alzheimer                                 | 6                            |
| ((SNAP-25) AND plasma) AND Alzheimer                              | 6                            |
| ((GFAP) AND CSF) AND Alzheimer                                    | 25                           |
| ((GFAP) AND plasma) AND Alzheimer                                 | 14                           |
| ((YKL-40) AND CSF) AND Alzheimer                                  | 57                           |
| ((YKL-40) AND plasma) AND Alzheimer                               | 5                            |
|                                                                   |                              |
| (PDAPP) AND Alzheimer                                             | 115                          |
| (Tg2576) AND Alzheimer                                            | 834                          |
| (APP23) AND Alzheimer                                             | 183                          |
| (APPPS1) AND Alzheimer                                            | 54                           |
| (APP/PS1) AND Alzheimer                                           | 1155                         |
| (3xTg-AD) AND Alzheimer                                           | 554                          |
| (TgF344-AD) AND Alzheimer                                         | 17                           |
| (McGill-R-Thy1-APP rat) AND Alzheimer                             | 23                           |
| (Tg478_Tg1116_Tg11587_triple_homozygous rat) and Alzheimer        | 3                            |
| Ferrous_ amyloid_ buthionine (FAB) rat and Alzheimer              | 4                            |
